1  
2  
3  
4  
5  
6  
7  
8  
9  
10  
11  
12  
13  
14  
15  
16  
17  
18  
19  
20

**Colonization and transmission of the gut microbiota  
of the burying beetle, *Nicrophorus vespilloides*,  
through development**

Yin Wang and Daniel E. Rozen\*

Institute of Biology, Leiden University, Leiden, The Netherlands

\* corresponding author: [d.e.rozen@biology.leidenuniv.nl](mailto:d.e.rozen@biology.leidenuniv.nl)

21 **Abstract:**

22

23

24 Carrion beetles in the genus *Nicrophorus* rear their offspring on decomposing  
25 carcasses where larvae are exposed to a diverse microbiome of decomposer bacteria.  
26 Parents coat the carcass with antimicrobial secretions prior to egg hatch (defined as  
27 Pre-Hatch care) and also feed regurgitated food, and potentially bacteria, to larvae  
28 throughout development (defined as Full care). Here we partition the roles of pre- and  
29 post-hatch parental care in the transmission and persistence of culturable symbiotic  
30 bacteria to larvae. Using three treatment groups (Full-Care, Pre-Hatch care only, and  
31 No Care), we found that larvae receiving Full-Care are predominantly colonized by  
32 bacteria resident in the maternal gut, while larvae receiving No Care are colonized  
33 exclusively with bacteria from the carcass. More importantly, larvae receiving only  
34 Pre-Hatch care were also predominantly colonized by maternal bacteria; this result  
35 indicates that parental treatment of the carcass, including application of bacteria to the  
36 carcass surface, is sufficient to ensure symbiont transfer even in the absence of direct  
37 larval feeding. Later in development, we found striking evidence that pupae undergo a  
38 aposymbiotic stage, after which they are recolonized at eclosion with bacteria shed in  
39 the moulted larval cuticle and on the wall of the pupal chamber. Our results clarify the  
40 importance of pre-hatch parental care for symbiont transmission in *Nicrophorus*  
41 *vespilloides*, and suggest that these bacteria successfully outcompete decomposer  
42 bacteria during larval and pupal gut colonization.

43

44

45 *Key words:* *Nicrophorus*, parental care, symbiosis, microbiota, transmission

46

47

48

49 **Importance**

50

51 Here we examine the origin and persistence of the culturable gut microbiota of larvae  
52 in the burying beetle *Nicrophorus vespilloides*. This insect is particularly interesting  
53 for this study because larvae are reared on decomposing vertebrate carcasses where  
54 they are exposed to high-densities of carrion-decomposing microbes. Larvae also  
55 receive extensive parental care in the form of carcass preservation and direct larval  
56 feeding. We find that parents transmit their gut bacteria to larvae both directly,  
57 through regurgitation, and indirectly via their effects on the carcass. In addition, we  
58 find that larvae become aposymbiotic during pupation, but are recolonized from  
59 bacteria shed onto the insect cuticle before adult eclosion. Our results highlight the  
60 diverse interactions between insect behavior and development on microbiota  
61 composition. They further indicate that strong competitive interactions mediate the  
62 bacterial composition of *Nicrophorus* larvae, suggesting that the bacterial  
63 communities of these insects may be highly coevolved with their host species.

64

## 65 **Introduction**

66

67 Animals are colonized by a diverse community of bacterial symbionts that play  
68 crucial roles in their ecology and evolution [1, 2]. This has been especially well  
69 studied in insects, whose bacterial symbionts can influence traits ranging from mate  
70 and diet choice [3] to susceptibility to natural enemies [4]. Bacterial symbionts can  
71 also differ in the fidelity of their associations with their insect hosts. Endosymbionts  
72 like *Buchnera* in aphids, that serve obligate functions for their insect hosts by  
73 overcoming host nutritional deficiencies, are highly specific and have been aphid-  
74 associated for millions of years [5]. At the opposite extreme, insects can retain  
75 transient associations with bacteria whose effects are more variable [6, 7, 8, 9].  
76 Although different factors may underlie the divergent influences of bacterial  
77 symbionts on insect hosts, one key component is the way that bacteria are transmitted  
78 between insect generations [10, 11]. Whereas obligate symbionts are almost  
79 exclusively transmitted vertically, often via direct passage through eggs, more  
80 transient associations, typical of the gut microbiota, involve an external stage where  
81 bacteria are reacquired horizontally each generation via ingestion [12, 13].

82

83 Distinguishing symbionts on the basis of transmission mode (vertical versus  
84 horizontal) has been extremely useful by focusing attention on how this can align the  
85 fitness interests of symbionts and hosts [14, 15]. However, many associations  
86 between insects and their microbial symbionts fall somewhere in the middle of these  
87 strict extremes. Among diverse possibilities, trophallaxis and coprophagy occurs  
88 when bacteria are passed horizontally between individuals via oral-oral/anal contact  
89 or fecal consumption [16, 17, 18]. Similarly, horizontal symbiont transmission can  
90 take place via ingestion of the bacteria-smearred egg-coat or via consumption of  
91 bacteria-rich capsules [19, 20]. While these methods of transfer can effectively  
92 vertically transmit symbionts from parent to offspring [12], the presence of an  
93 environmental component implies that young and developing insects can be  
94 simultaneously colonized by beneficial symbionts as well as environmental bacteria  
95 that can harm the host [20, 21]. In these cases, establishment of the inherited  
96 microbiota will be dependent on the ability for inherited symbionts to competitively  
97 exclude environmental bacteria, as well as the timing and manner of their acquisition  
98 [22, 23]. Additionally, especially for holometabolous insects that undergo a complete

99 metamorphosis, the manner of acquisition can change markedly throughout  
100 development, at one stage occurring from the mother while at later stages through  
101 alternative transmission routes [24].  
102  
103 Here, we examine the mechanisms of transmission and stability of the culturable gut  
104 microbiota of the carrion beetle, *Nicrophorus vespilloides*, throughout its  
105 development. This system is particularly interesting for addressing these questions  
106 given the peculiar life-history of these organisms. Nicrophorus beetles are reared on  
107 decomposing carrion where they encounter and ingest high densities of microbes [25].  
108 Eggs are laid in the soil in close proximity to the carcass [26]. Upon hatching larvae  
109 migrate to the carcass where they both self-feed and are fed regurgitated material  
110 from the caring parents [27, 28]. Next, following an ~ 6-7 day feeding period upon  
111 the carcass, larvae cease feeding and disperse into the surrounding environment where  
112 they eventually pupate individually in underground chambers. Finally, pupae eclose  
113 into adults, and emerge from the pupal chambers to commence feeding [29, 30].  
114  
115 *N. vespilloides* larvae may be colonized by a varied microbiota throughout  
116 development [25, 31, 32], and this will likely be influenced by both the presence of  
117 parents and the stage of development [25, 33]. First, parents may modify the carcass  
118 microbiota by coating it in antimicrobial secretions throughout the period of parental  
119 care [21, 34, 35]. Notably, these secretions are not sterile and contain significant  
120 numbers of bacteria that can proliferate on the carcass. Secondly, parents feed larvae  
121 with regurgitated food which may facilitate the transfer of the parental gut microbiota  
122 to offspring (Post-hatch care) [36]. Finally, following dispersal, larvae cease feeding,  
123 thereby preventing continued colonization from diet-borne bacteria; and then during  
124 metamorphosis they shed the larval gut [37, 38]. At present, there is no understanding  
125 of the dynamics of these gut bacterial communities through time.  
126  
127 There is little knowledge of the colonization dynamics of Nicrophorus gut bacteria or  
128 the extent to which colonization is influenced by parental care, a hallmark of this  
129 system. To examine these questions we manipulated *N. vespilloides* parental care and  
130 used a culture-based approach to monitor the dynamics of symbiont colonization and  
131 stability through development. Although culturing can underestimate bacterial  
132 densities when compared to total cell counts or sequence-based approaches (see

133 Supplemental Figure 2), this approach allowed us to examine the largest set of  
134 experimental conditions, while also identifying the bacterial groups that can be  
135 experimentally manipulated to understand mechanisms of colonization and  
136 community assembly of the microbiota using the *Nicrophorus* model system. Briefly,  
137 our results provide strong evidence that beetle parents play a defining role of the  
138 establishment of the bacteria residing in *Nicrophorus* larval guts; however, continuous  
139 parental care and feeding is not essential for the stable maintenance of this microbiota.  
140 Most strikingly, we also find that pupae undergo a sterile aposymbiotic stage, after  
141 which they are recolonized from the bacteria shed into the pupal chamber. We discuss  
142 these results in the context of the role of the *Nicrophorus* microbiota for beetle fitness.

143

## 144 **Methods**

145

### 146 **General procedures**

147

148 Experimental beetles were taken from an outbred laboratory population derived  
149 from wild-caught *N. vespilloides* individuals trapped in Warmond near Leiden in The  
150 Netherlands, between May and June 2014. Beetles were maintained in the laboratory at  
151 20°C with a 15:9 hour light:dark cycle. All adults were fed fresh chicken liver twice  
152 weekly. To generate outcrossed broods, non-sibling pairs of beetles were allowed to  
153 mate for 24 hours in small plastic containers with soil. Next the mated pair were  
154 provided with a freshly thawed mouse carcass weighing 24-26 g in a 15cm × 10cm  
155 plastic box filled with approximately 1-2 cm of moist soil. Although fresh carcasses  
156 may differ in bacterial composition from aged carcasses [39], our use fresh carcasses in  
157 this study ensured higher brood success and is consistent with recent data showing that  
158 most mouse carcasses are discovered shortly after they are placed in experimental  
159 forests [40] Broods were reared in sterile soil until the point of larval dispersal from  
160 the carcass, after which larvae were transferred to new boxes for pupation with  
161 unsterilized peat soil to complete development. Soil was sterilized using two autoclave  
162 cycles at 121°C for 30 minutes, with a cooling interval between cycles.

163

### 164 **Maternal care manipulation**

165 To examine the role of parental care on the acquisition and composition of beetle gut  
166 bacteria, we reared larvae under three treatment conditions that modified the degree of  
167 parental care they received [25]: 1) Full Care (FC) broods experienced complete  
168 parental care, including pre- and post-hatch care; 2) Pre-hatch parental care (PPC)  
169 broods were reared on a carcass that had been prepared by the female, after which she  
170 was removed prior to the hatch/arrival of larvae; and 3) no-care (NC) broods  
171 experienced neither pre- nor post-hatch care. Broods in all treatments were initiated  
172 similarly. Mated females were provided with a fresh carcass and induced to lay eggs.  
173 Eggs were collected and surface sterilized within 12-24 hours and these were then  
174 used to generate replicate broods of 15-20 larvae each. Females remained with their  
175 prepared carcasses in FC broods, while females were removed prior to reintroducing  
176 larvae in the PPC broods. NC larvae were provided with a freshly thawed carcass with  
177 a sterile incision in the abdomen to permit larval entry.

178

### 179 **Bacterial density and composition throughout development**

180

181 We examined the dynamics of *N. vespilloides* intestinal microbiota through time  
182 by destructively sampling beetles throughout development. To quantify gut bacterial  
183 CFU, the whole intestinal tract from each beetle from independent broods ( $n = 3$  at  
184 each time point) was carefully removed with fine forceps and suspended in 0.7 ml  
185 sterile sodium phosphate buffer (PBS; 100 mM; pH 7.2). The inner contents of pupa  
186 were examined in their entirety owing to the absence of a clear gut at this stage.  
187 Individual gut/pupal contents were serially diluted in PBS and plated on 1/3 strength  
188 Tryptic Soy Broth agar and incubated at 30°C. In experiments shown in Supplemental  
189 Figure 1, we also directly compared bacterial densities determined from total  
190 microscopic counts versus via plating. Although plating for CFU consistently  
191 underestimates bacterial densities, this approach recovered up to 60% of total counts  
192 and the dynamics of bacterial densities perfectly mirror those based on total counts.  
193 The composition of the maternal microbiota was characterized from  $n = 3$  mated  
194 females.

195

196 At each time point from each treatment, we isolated random colonies ( $n \geq 100$ ) from  
197 individual beetles to analyze for species identification using MALDI-TOF Mass

198 Spectrometry (Matrix Assisted Laser Desorption Ionization-Time of Flight) with the  
199 Biotyper platform (Bruker Daltonic GmbH). By generating unique whole-cell protein-  
200 based fingerprints for each colony, the Biotyper permits highly reproducible  
201 identification of bacterial colonies to the genus or species level. Because of its  
202 reproducibility, ease of use and cost effectiveness, the Biotyper is used extensively in  
203 clinical and public health microbiological laboratories [41] and is finding increased  
204 use in ecological studies [42, 43, 44]. To standardize growth prior to analysis,  
205 individual colonies were tooth-picked onto a 1/3 TS plate and grown overnight.  
206 Colonies were then transferred directly to a 96-well steel MALDI-TOF target plate  
207 and coated with 1 µl of alpha-cyano-4-hydroxy cinamic acid (HCCA) matrix  
208 comprised of Acetonitrile (50%), Trifluoroacetic acid (2.5%) and water (47.5%), and  
209 dried at room temperature. The target plate was subsequently inserted into the  
210 Biotyper system for analysis. Next, mass spectrometry was carried out using the  
211 MALDI Biotyper RTC (Realtime classification) and analyzed using Biotyper 3.0  
212 (Bruker DALtonic GmbH). Spectra were collected under the linear positive mode in  
213 the mass range of 3 to 20 kDa and a sample rate of 0.5 GS/s (laser frequency, 60 Hz;  
214 ion source 1 voltage, 20.08 kV; ion source 2 voltage, 18.6 kV; lens voltage, 7.83 kV).  
215 The Bruker bacterial test standard (BTS 8255343) was measured for standardization  
216 of MALDI calibration before the specimens were processed. Spectra were compared  
217 to the reference library provided by Bruker which identified 62.3% of the colonies to  
218 species level overall using a stringent cut-off of 1.699, below which indicated no  
219 reliable identification (in the Bruker library) [45, 46]. To confirm these assignments  
220 and to establish the identity of colonies whose spectra were not included in the Bruker  
221 database, all unique MS spectra (including both those with positive hits and those not  
222 present in the Biotyper database) were subsequently analyzed using 16s rDNA  
223 sequencing. Colony PCR using primers 27F (5'AGAGTTTGATCCTGGCTCAG-3')  
224 and 1492R (5'-GGTTACCTTGTTACGACTT-3') was used for bacterial 16s rRNA  
225 gene amplification [47]. The PCR cycling conditions were as follow: 95 °C for 5 min,  
226 then 34 cycles of 95°C for 45 s, 55°C for 45 s, 72°C for 1 min. PCR products were  
227 directly sequenced via the DNA Markerpoint in Leiden and 16s sequences were  
228 classified for bacterial taxonomy using a nucleotide BLAST against the NCBI  
229 database. The Bruker database was manually updated to include new samples thus  
230 obtained.



231

232 A second experiment was conducted to determine the source of bacterial re-  
233 colonization following beetle pupation. Pupae were removed from their chambers and  
234 both the inside of the chamber and the cuticle were swabbed with a sterile, moist,  
235 cotton swab. The bacteria on the swab were resuspended in sterile water and serially  
236 diluted onto 1/3 TS agar. Finally, soil from outside the pupal chamber was collected  
237 and diluted into PBS and plated. Colonies were isolated and identified as above using  
238 a combination of MALDI-TOF Biotyping and 16s rDNA sequencing. To exclude rare  
239 or transient bacterial species, we established a minimum threshold frequency of 1%,  
240 averaged over all sampling periods for each treatment set, prior to analysis of  
241 community composition.

242

### 243 **Statistical analysis**

244

245 Bacterial CFU through time were analyzed using General Linear Models (GLM) with  
246 time and treatment as factors. Community composition was analyzed using the Vegan  
247 package in R [48]. Beta diversity among the different treatments was analyzed using  
248 ANOSIM, which is based on a Bray-Curtis dissimilarity matrix [49, 50]. The  
249 Dendrograms to examine community similarity were generated based on the matrix of  
250 mean within-group and between-group distances and the R function *hclust* was used  
251 for hierarchical clustering.

252

### 253 **Results**

254

#### 255 **Bacterial CFU vary through development and as a function of parental care**

256

257 The CFU of intestinal bacteria was quantified throughout development for three  
258 treatment groups corresponding to different levels of parental care. Following  
259 hatching from sterile eggs, larvae from all treatments rapidly acquire high bacterial  
260 densities within their guts. Bacterial densities vary significantly through time (GLM  
261 analyses:  $df = 10$ ,  $P < 0.001$ ) and as a function of treatment (GLM:  $df = 2$ ,  $P = 0.006$ )  
262 and vary across nearly 6 orders of magnitude as a function of developmental stage.  
263 These dynamics are insensitive to experimental methods, as estimates of density  
264 based on total microscopic counts perfectly mirror those determined by plate counting

265 (Supplemental Figure 2). During larval feeding on the carcass, bacterial densities  
266 increase in all treatments, reaching densities of  $\sim 10^6$  / larva. By contrast, following  
267 dispersal, bacterial populations precipitously decline until, during pupation, bacteria  
268 were undetectable. Finally, as pupae eclose and reemerge from pupal chambers, they  
269 reacquire a high-density bacterial population within their guts (Fig. 1). It is notable  
270 that this recovery occurs prior to feeding and before emergence from the pupal  
271 chamber, indicating that recolonization takes place from bacteria resident within the  
272 pupal chamber itself.

273

#### 274 **Composition of *N. vespilloides* larval symbionts**

275

276 Although bacterial densities differ across parental-care treatments there is broad  
277 overlap in the dynamics of CFU change through time. Despite these similarities, the  
278 composition and diversity (Table S1) of these communities may vary. To understand  
279 these differences and to illuminate transmission dynamics from mothers to larvae, we  
280 tracked community composition of gut bacteria within larvae throughout development  
281 (Fig. 2) using MALDI-TOF Mass-Spectrometry and compared these to the maternal  
282 samples. The maternal microbiota was dominated by four bacterial Genera that  
283 together comprised  $> 65\%$  of recovered CFU, including *Providencia*, *Morganella*,  
284 *Vagococcus* and *Proteus*, with several other genera appearing in lower frequencies  
285 (Fig. 2). We next examined genus level composition across the three larval treatment  
286 groups. As anticipated if transmission occurs via parents, we observed significant  
287 overlap in the bacterial communities of parental and larval gut communities from  
288 larvae receiving parental care throughout development ( $R_{FC-g \text{ vs Mother}}=0.277$ ;  $P=0.028$ ,  
289 Table 1), as R values  $< 0.25$  correspond to “barely separable” groups [51]. Equally,  
290 although to a lesser degree there is concordance between the maternal microbiota and  
291 those of larvae receiving pre-hatch care only ( $R_{PPC-g \text{ vs Mother}}= 0.331$ ;  $P = 0.066$ , Table  
292 1). By contrast, larvae reared in the absence of parental care are highly diverged from  
293 the parental microbiota ( $R_{NC-g \text{ vs Mother}}= 1$ ;  $P = 0.007$ , Table 1) (Figs 3A and 3B). In  
294 particular, the gut community of NC larvae was shifted towards bacterial groups  
295 likely acquired from either the soil or the carcass (Figs 2 and 3C), e.g. *Escherichia*  
296 *coli* (23.5%), *Serratia* (20.4%) and *Staphylococcus* (19.2%).

297

298 In comparing the larval microbiota of the three treatment groups, ANOSIM analysis  
299 illustrated clear differences between the treatment groups overall (Global test:  $R =$   
300  $0.815$ ,  $P = 0.001$ ) and although there are differences between the FC and PPC larvae,  
301 there is much greater similarity between the two groups with parental care ( $R_{FC-g \text{ vs}}$   
302  $_{PPC-g} = 0.665$ ;  $P = 0.001$ ) compared to either care group and the no-care larvae ( $R_{FC-g \text{ vs}}$   
303  $_{NC-g} = 0.956$ ,  $P=0.001$ ;  $R_{PPC-g \text{ vs } NC-g} = 0.994$ ,  $P=0.001$ ) (Table 1, Fig. S1). This is also  
304 apparent in the Venn diagrams in Fig. 3A, focusing on presence/absence of specific  
305 bacterial groups. Together, these results indicate that transmission of the beetle  
306 microbiota occurs predominantly from parents to offspring. However, they also reveal  
307 that continued replenishment of bacteria from parent to offspring via feeding is  
308 unnecessary to establish the endogenous microbiota. Instead transmission can occur  
309 indirectly via deposition of the maternal bacteria on to the carcass by the mother  
310 during carcass preparation and subsequent colonization of larva via self-feeding.  
311

### 312 **Re-colonization of *N. vespilloides* symbionts**

313

314 A striking result from these analyses is the aposymbiotic stage occurring during  
315 pupation, followed by recolonization from within the pupal chamber. Notably, this  
316 result based on CFU was further confirmed by direct microscopic counts  
317 (Supplemental Figure 2). To assess the source of recolonization, we sampled bacterial  
318 populations from the pupal cuticle and the wall of the pupal chamber, together with  
319 samples from the bulk soil in which pupal chambers were constructed. Treatment  
320 designations are as above, with the addition of subscripts corresponding to each  
321 sampling site. For example, FC-g refers to samples taken from the guts of larvae  
322 receiving Full Care, while FC-c represents samples from the cuticle and chamber wall  
323 of these same larvae. These analyses showed that the *N. vespilloides* pupal cuticle and  
324 chamber soil had very similar compositions (FC-g, FC-c:  $R = 0.32$ ,  $P = 0.068$ ; PPC-g,  
325 PPC-c:  $R = 0.02$ ,  $P = 0.052$ ; NC-g, NC-c:  $R = 0.03$ ,  $P = 0.0397$  by Pairwise test of  
326 ANOSIM, Table 1), and that these were diverged compared to the bulk soil (FC-c,  
327 Soil:  $R = 0.89$ ,  $P = 0.094$ ; PPC-c, Soil:  $R = 1$ ,  $P = 0.114$ ; NC-c, Soil:  $R = 1$ ,  $P = 0.099$   
328 by Pairwise test of ANOSIM, Table 1). Importantly, many bacterial genera  
329 irrespective of treatment, were found in the pre-pupal gut and the cuticle but  
330 infrequently or not at all in the soil. For example, the most common bacterial groups  
331 in FC larvae contained *Providencia* (FC-g: 18.3% vs FC-c: 17.1%), *Morganella* (FC-

332 g: 10.0% vs FC-c: 8.7% ), *Proteus* (FC-g: 14.0% vs FC-c: 3.9%), *Vagococcus* (FC-g:  
333 7.0% vs FC-c: 6.1%), *Neisseria* (FC-g: 8.3% vs FC-c: 4.7%), and *Koukoulia* (FC-g:  
334 13.2% vs FC-c: 8.9%), while these were absent from soil. Similarly, the most  
335 abundant genera in NC beetles were only found in NC-g and NC-c: *Escherichia coli*  
336 (NC-g: 23.5% vs NC-c: 23.8%), *Enterococcus* (NC-g: 18.5% vs NC-c: 18.8%) (Fig.  
337 4A and 4B). These results indicate that the core components of previously colonized  
338 gut bacteria can successfully recolonize the host intestinal system after the  
339 aposymbiotic stage characteristic of pupation. Thus, although transmission and  
340 recolonization to larvae occurs via the environment, the bacterial species that  
341 recolonize the newly eclosing adult are highly biased towards bacterial species that  
342 were already present in the pre-pupal gut and which were originally acquired from the  
343 mother.

344

#### 345 **Discussion**

346 Animal symbionts can be passed to offspring through different mechanisms that vary  
347 in their reliability of transmission [10, 11]. While strict endosymbionts of animals are  
348 typically transmitted vertically via eggs, other mechanisms that include an  
349 environmental component may also reliably transmit bacteria between generations [14,  
350 19]. Here, we examined the mechanisms of bacterial transmission from *Nicrophorus*  
351 *vespilloides* mothers to offspring. *Nicrophorus* larvae are exposed to and consume  
352 high densities of bacteria throughout their development on decomposing carrion [25].  
353 In earlier studies we showed that parental care, including preservation of the carcass  
354 through secretion of lysozyme and potentially other antimicrobials, is essential for  
355 maintaining larval fitness [21]. Additionally, preliminary metagenomic analyses from  
356 our own lab (unpublished data) and published studies from others [39] have found  
357 that parental beetles significantly modify the bacterial composition of decomposing  
358 carrion, thereby potentially influencing the bacteria that larvae are exposed to and  
359 ingest.

360

361 To examine the influence of parental care on the transmission of bacteria from parents  
362 to offspring, we manipulated the level of care parents provide to their larvae. With  
363 full parental care, parents apply oral and anal secretions to the carcass both before  
364 larvae hatch and throughout larval development [21, 32]; they also regurgitate food to  
365 larvae during the first three to four days of development [27, 52]. As expected, given

366 the continuous direct and indirect exposure to parental bacteria, larvae in this  
367 treatment were colonized predominantly with parental symbionts (Fig 2); importantly,  
368 despite limitations associated with a CFU-based approach, we observed broad overlap  
369 between the dominant bacterial species we cultured and those identified using  
370 sequence-based approaches (e.g *Providencia*, *Morganella*, *Vagococcus*, *Proteus*,  
371 *Koukoulia*, and *Serratia*) [53]. However, with this Full Care treatment alone, it could  
372 not be determined if larvae require constant replenishment of the parental species for  
373 these to be maintained in the larval gut [54]. One possibility, for example, is that the  
374 dominant bacteria from the carcass could outcompete endogenous beetle bacteria  
375 within the larval gut; this could be driven actively, if the bacteria on the carcass are  
376 particularly good colonizers, or passively since larval exposure to carcass bacteria is  
377 continuous [22, 23]. To address this question, we established broods that only  
378 received pre-hatch care. In this treatment, parents have no direct exposure to larvae,  
379 and can only influence larval exposure to bacteria indirectly through their influence  
380 on the carcass. It is important to note that because eggs are sterile, transmission is also  
381 prevented through this route [26]. As with the Full Care treatment, larvae receiving  
382 only Pre-hatch care were also predominantly colonized by maternal bacteria (Figs 2  
383 and 3). This was not due to an inability of bacteria from the gut to colonize larvae, as  
384 larvae in the No-Care treatment were also colonized by a high-density bacterial  
385 microbiota. Also, bacteria in the pre-hatch groups were partially colonized by carcass-  
386 derived bacteria (Figs 2 and 3C), leading to higher bacterial diversity overall in this  
387 group (Supplemental Table 1) and indicating the capacity for carcass-derived bacteria  
388 to establish themselves within the larval gut. Rather, we interpret this result to  
389 indicate that “endogenous” bacteria from the mother are able to outcompete the  
390 carrion associated microbes. Furthermore, this effect is long-lasting and can persist  
391 entirely in the absence of direct maternal feeding. Although this interpretation is  
392 consistent with our data, this hypothesis will require experimental testing using the  
393 culturable species we have now established in our collection of *N. vespilloides*  
394 symbionts.

395

396 At present, we understand relatively few of the mechanisms used by parents to  
397 manipulate the carcass bacteria. However, several factors are likely to be important.  
398 First, when parents locate a carcass they strip it of fur, while simultaneously coating  
399 the carcass surface with oral and anal secretions. The composition of these secretions

400 has only been partially characterized, but a key component is lysozyme, a broad-  
401 spectrum antibacterial with greater specificity towards Gram-positive bacteria [32,  
402 55]. Additionally, oral secretions contain bacteria that can serve as an inoculum to  
403 feeding larvae (unpublished results). In addition to these behaviors, we have also  
404 observed parents opening the carcass and removing the mouse gut, behaviors that  
405 could potentially have a dramatic influence on larval bacterial exposure by  
406 introducing oxygen that could bias the bacterial community towards aerobic species  
407 or more simply by directly reducing the overall density of bacteria to which larvae are  
408 exposed. Following gut removal, parents continue to coat the carcass in secretions and  
409 then bury the balled up carrion underground [21, 29, 52], which could influence  
410 moisture or temperature levels. Both behaviors could possibly bias the persisting  
411 microbial species, and potentially in favor of species originally introduced by caring  
412 parents. In addition, caring parents and their larvae may be exposed to different  
413 bacterial numbers and composition as a function of carcass age, a factor that is known  
414 to have a dramatic influence on larval fitness [25, 56]. Although much remains to be  
415 determined of these processes, our results clarify the importance of more completely  
416 understanding how parents influence both the bacteria on the carcass and how this, in  
417 turn, affects larval microbiota establishment.

418

419 After larvae complete feeding, they migrate into the soil to pupate [29, 52]. Bacterial  
420 numbers during this stage decline precipitously (Fig. 1 and Supplemental Figure 2), in  
421 part due to the absence of feeding and also to the evacuation of the larval gut. In  
422 addition, larvae in some metamorphosing insects undergo a pre-pupal molt which  
423 would further reduce bacterial numbers [50, 57]. Regardless of the mechanisms, it  
424 appears that *Nicrophorus* larvae become effectively sterile during pupation, an  
425 outcome previously seen in several flies and mosquitoes [58, 59, 60]. It is possible  
426 that host immunity facilitates pupal symbiont suppression during metamorphosis [57,  
427 61, 62], as a decline of phagocytic haemocytes and an increasing phenoloxidase  
428 activity were both detected in *Nicrophorus* pupa [63]. Following this aposymbiotic  
429 state, bacterial densities are quickly recovered at eclosion with bacterial communities  
430 that significantly overlap with those present prior to pupation (Figs 1 and 2). To  
431 determine the source of recolonization, we sampled bacteria from the pupal molt as  
432 well as the wall of the pupal chambers, and in both cases we observed striking  
433 similarity to the microbiomes of earlier developmental stages. Interestingly, this was



434 true for all treatment groups, suggesting that there is no intrinsic bias to recolonization,  
435 but rather that eclosing beetles are colonized by a subset of the bacterial species  
436 present in the pupal chamber.

437

438 The larval gut of *N. vespilloides* thus appears to be colonized via a combination of  
439 mechanisms that are dependent on the degree of parental care and the stage of  
440 development. With complete parental care, parents transmit bacteria to larvae through  
441 a combination of direct feeding and through an indirect effect mediated by the carcass  
442 [36, 39]. At present, it remains unclear if this latter component is because  
443 *Nicrophorus* symbionts outcompete the mouse carrion microbiota within the larval  
444 gut, or if this occurs primarily on the carcass surface itself. However, the former  
445 seems more likely given the vast differences in larval exposure to these two groups of  
446 bacteria, and the fact that larvae in the pre-hatch group remained colonized by beetle  
447 symbionts, despite lacking any direct exposure to parents (Fig. 2). It is tempting,  
448 given the reliable mode of transmission from parents to larvae, to speculate about the  
449 function of these symbionts for *Nicrophorus* growth and development, particularly the  
450 role of these bacteria in limiting infection from carrion-borne bacteria [39, 53].  
451 However, this remains an active area of research that we will hope to address in future  
452 publications. In addition, it will be important to supplement the present work with  
453 more detailed analyses based upon sequencing [39, 53]. Although culture-based  
454 methods play an essential role in unraveling the relationships between invertebrate  
455 host sociality and their symbiont strain-level diversity [64], they are clearly  
456 complementary to sequence-based methods that can recover bacterial groups that may  
457 be difficult or impossible to culture in the laboratory. Our work clarifies the key links  
458 between *Nicrophorus* social behavior and symbiont transmission. This is likely to  
459 have parallels in other animal systems where parents invest in the care of offspring.

460

#### 461 **Acknowledgements**

462 Funding for this work was provided by start-up funds from Leiden University to DR  
463 and from a studentship from the China Scholarship Council to YW. We gratefully  
464 acknowledge expert assistance with beetle maintenance from Kees Koops, and thank  
465 Andres Arce and Chris Jacobs for their extremely helpful comments on an earlier  
466 version of this manuscript. In addition, we gratefully acknowledge the helpful and

467 constructive comments from the Editor, Eric Stabb, and three anonymous reviewers  
468 on an earlier submission of this manuscript.

469

## 470 **References**

471

- 472 1. Engela, P., Kwong, W. K., McFrederick, Q., Anderson, K. E., Barribeau, S.  
473 M., Chandler, J. A., Cornman, R. S., Dainat, J., de Miranda, J. R., Doublet, V.,  
474 Emery, O., Evans, J. D., Farinelli, L., Flenniken, M. L., Granberg, F., Grasis, J.  
475 A., Gauthier, L., Hayer, J., Koch, H., Kocher, S., Martinson, V. G., Moran, N.,  
476 Munoz-Torres, M., Newton, I., Paxton, R. J., Powell, E., Sadd, B. M., Schmid-  
477 Hempel, P., Schmid-Hempel, R., Song, S. J., Schwar, R. S., van Engelsdorp,  
478 D., and Dainat, B.. 2016 The Bee Microbiome: Impact on Bee Health and  
479 Model for Evolution and Ecology of Host-Microbe Interactions. *MBio* **7**,  
480 e02164–15. (doi:10.1128/mBio.02164-15)
- 481 2. Peterson, B. F. & Scharf, M. E. 2016 Lower Termite Associations with  
482 Microbes: Synergy, Protection, and Interplay. *Front. Microbiol.* **7**, 422.  
483 (doi:10.3389/fmicb.2016.00422)
- 484 3. Ezenwa, V. O., Gerardo, N. M., Inouye, D. W., Medina, M. & Xavier, J. B. 2012  
485 Animal Behavior and the Microbiota. *Science (80-. )*. **338**, 198–199.  
486 (doi:10.1126/science.1227412)
- 487 4. Sanders, D., Kehoe, R., van Veen, F. F., McLean, A., Godfray, H. C. J., Dicke, M.,  
488 Gols, R. & Frago, E. 2016 Defensive insect symbiont leads to cascading  
489 extinctions and community collapse. *Ecol. Lett.* **19**, 789–799.  
490 (doi:10.1111/ele.12616)
- 491 5. Shigenobu, S., Watanabe, H., Hattori, M., Sakaki, Y. & Ishikawa, H. 2000  
492 Genome sequence of the endocellular bacterial symbiont of aphids Buchnera  
493 sp. APS. *Nature* **407**, 81–86. (doi:10.1038/35024074)
- 494 6. Vallet-Gely, I., Lemaitre, B. & Boccard, F. 2008 Bacterial strategies to  
495 overcome insect defences. *Nat Rev Microbiol* **6**, 302–313.  
496 (doi:10.1038/nrmicro1870)
- 497 7. Bulla, L. a 1975 Bacteria as insect pathogens. *Annu. Rev. Microbiol.* **29**, 163–  
498 190. (doi:10.1146/annurev.mi.29.100175.001115)
- 499 8. Lund, M. B., Holmstrup, M., Lomstein, B. A., Damgaard, C. & Schramm, A.  
500 2010 Beneficial effect of verminephrobacter nephridial symbionts on the  
501 fitness of the earthworm aporrectodea tuberculata. *Appl. Environ. Microbiol.*  
502 **76**, 4738–4743. (doi:10.1128/AEM.00108-10)
- 503 9. Douglas, A. E. 2014 Multiorganismal Insects: Diversity and Function of  
504 Resident Microorganisms. *Annu. Rev. Entomol.* , 1–18. (doi:10.1146/annurev-  
505 ento-010814-020822)
- 506 10. Bright, M. & Bulgheresi, S. 2010 A complex journey: transmission of  
507 microbial symbionts. *Nat. Rev. Microbiol.* **8**, 218–230.  
508 (doi:10.1038/nrmicro2262)
- 509 11. Baalen, M. Van 2000 Parent-to-offspring infection and the struggle for  
510 transmission. *Evol. Biol. host-parasite relationships ...*
- 511 12. Hosokawa, T., Hironaka, M., Inadomi, K., Mukai, H., Nikoh, N. & Fukatsu, T.  
512 2013 Diverse Strategies for Vertical Symbiont Transmission among Subsocial  
513 Stinkbugs. *PLoS One* **8**, 4–11. (doi:10.1371/journal.pone.0065081)
- 514 13. Estes, A. M., Hearn, D. J., Snell-Rood, E. C., Feindler, M., Feeser, K., Abebe,



- 515 T., Dunning Hotopp, J. C. & Moczek, A. P. 2013 Brood ball-mediated  
516 transmission of microbiome members in the dung beetle, *Onthophagus taurus*  
517 (Coleoptera: Scarabaeidae). *PLoS One* **8**, 1–15.  
518 (doi:10.1371/journal.pone.0079061)
- 519 14. Russell, J. a & Moran, N. a 2005 Horizontal Transfer of Bacterial Symbionts :  
520 Heritability and Fitness Effects in a Novel Aphid Host Horizontal Transfer of  
521 Bacterial Symbionts : Heritability and Fitness Effects in a Novel Aphid Host.  
522 *Appl. Environ. Microbiol.* **71**, 7987–7994. (doi:10.1128/AEM.71.12.7987)
- 523 15. Drown, D. M., Zee, P. C., Brandvain, Y. & Wade, M. J. 2013 Evolution of  
524 transmission mode in obligate symbionts. *Evol. Ecol. Res.* **15**, 43–59.
- 525 16. Dahbi, a, Hefetz, A., Cerda, X. & Lenoir, A. 1999 Trophallaxis mediates  
526 uniformity of colony odor in *Cataglyphis iberica* ants (Hymenoptera,  
527 Formicidae). *J Insect Behav* **12**, 559–567. (doi:10.1023/A:1020975009450)
- 528 17. Zimmer, M. & Topp, W. 2002 The role of coprophagy in nutrient release from  
529 feces of phytophagous insects. *Soil Biol. Biochem.* **34**, 1093–1099.  
530 (doi:10.1016/S0038-0717(02)00044-5)
- 531 18. Ott, B. M., Cruciger, M., Dacks, A. M. & Rio, R. V. M. 2014 Hitchhiking of  
532 host biology by beneficial symbionts enhances transmission. *Sci. Rep.* **4**, 5825.  
533 (doi:10.1038/srep05825)
- 534 19. Kikuchi, Y., Hosokawa, T. & Fukatsu, T. 2007 Insect-microbe mutualism  
535 without vertical transmission: A stinkbug acquires a beneficial gut symbiont  
536 from the environment every generation. *Appl. Environ. Microbiol.* **73**, 4308–  
537 4316. (doi:10.1128/AEM.00067-07)
- 538 20. Salem, H., Florez, L., Gerardo, N. & Kaltenpoth, M. 2015 An out-of-body  
539 experience: the extracellular dimension for the transmission of mutualistic  
540 bacteria in insects. *Proc. R. Soc. B Biol. Sci.* **282**, 20142957–20142957.  
541 (doi:10.1098/rspb.2014.2957)
- 542 21. Arce, A. N., Johnston, P. R., Smiseth, P. T. & Rozen, D. E. 2012 Mechanisms  
543 and fitness effects of antibacterial defences in a carrion beetle. *J. Evol. Biol.* **25**,  
544 930–937. (doi:10.1111/j.1420-9101.2012.02486.x)
- 545 22. Coyte, K. Z., Schluter, J. & Foster, K. R. 2015 The ecology of the microbiome:  
546 Networks, competition, and stability. *Science (80-. ).* **350**, 663–666.  
547 (doi:10.1126/science.aad2602)
- 548 23. Devevey, G., Dang, T., Graves, C. J., Murray, S. & Brisson, D. 2015 First  
549 arrived takes all: inhibitory priority effects dominate competition between co-  
550 infecting *Borrelia burgdorferi* strains. *BMC Microbiol.* **15**, 381.  
551 (doi:10.1186/s12866-015-0381-0)
- 552 24. Ahmed, M. Z., Breinholt, J. W. & Kawahara, A. Y. 2016 Evidence for  
553 common horizontal transmission of *Wolbachia* among butterflies and moths.  
554 *BMC Evol. Biol.* **16**, 118. (doi:10.1186/s12862-016-0660-x)
- 555 25. Rozen, D. E., Engelmoer, D. J. P. & Smiseth, P. T. 2008 Antimicrobial  
556 strategies in burying beetles breeding on carrion. *Proc. Natl. Acad. Sci. U. S. A.*  
557 **105**, 17890–17895. (doi:10.1073/pnas.0805403105)
- 558 26. Jacobs, C. G. C., Wang, Y., Vogel, H., Vilcinskas, A., van der Zee, M. &  
559 Rozen, D. E. 2014 Egg survival is reduced by grave-soil microbes in the  
560 carrion beetle, *Nicrophorus vespilloides*. *BMC Evol. Biol.* **14**, 208.  
561 (doi:10.1186/s12862-014-0208-x)
- 562 27. Smiseth, P. T., Darwell, C. T. & Moore, A. J. 2003 Partial begging: an  
563 empirical model for the early evolution of offspring signalling. *Proc. Biol. Sci.*  
564 **270**, 1773–7. (doi:10.1098/rspb.2003.2444)

- 565 28. Scott, M. P. 1989 Male parental care and reproductive success in the burying  
566 beetle, *Nicrophorus orbicollis*. *J. Insect Behav.* **2**, 133–137.  
567 (doi:10.1007/BF01053623)
- 568 29. Scott, M. P. 1998 The ecology and behaviour of burying beetles. *Annu. Rev.*  
569 *Entomol.* **43**, 595–618.
- 570 30. Smith, R. J. 2002 Effect of larval body size on overwinter survival and  
571 emerging adult size in the burying beetle, *Nicrophorus investigator*. *Can. J.*  
572 *Zool.* **80**, 1588–1593. (doi:10.1139/z02-151)
- 573 31. Janzen D.H. 1977 Why fruits rot, seeds mold, and meat spoils. *Am Nat.* **111**,  
574 691-713.
- 575 32. Hall, C. L., Wadsworth, N. K., Howard, D. R., Jennings, E. M., Farrell, L. D.,  
576 Magnuson, T. S. & Smith, R. J. 2011 Inhibition of microorganisms on a carrion  
577 breeding resource: the antimicrobial peptide activity of burying beetle  
578 (Coleoptera: Silphidae) oral and anal secretions. *Environ. Entomol.* **40**, 669–78.  
579 (doi:10.1603/EN10137)
- 580 33. Anduaga, S. & Huerta, C. 2001 Effect of parental care on the duration of larval  
581 development and offspring survival in *Nicrophorus mexicanus* Matthews  
582 (Coleoptera: Silphidae). *Coleopta Bull.* **55**, 264–270. (doi:10.1649/0010-  
583 065X(2001)055)
- 584 34. Cotter, S. C. & Kilner, R. M. 2010 Sexual division of antibacterial resource  
585 defence in breeding burying beetles, *Nicrophorus vespilloides*. *J. Anim. Ecol.*  
586 **79**, 35–43. (doi:10.1111/j.1365-2656.2009.01593.x)
- 587 35. Hoback, W. W., Bishop, A. A., Kroemer, J., Scalzitti, J. & Shaffer, J. J. 2004  
588 Differences among antimicrobial properties of carrion beetle secretions reflect  
589 phylogeny and ecology. *J. Chem. Ecol.* **30**, 719–729.  
590 (doi:10.1023/B:JOEC.0000028427.53141.41)
- 591 36. Eggert, A.-K., Reinking, M., Mu, J. K. & Ller, } 1998 Parental care improves  
592 offspring survival and growth in burying beetles. *Anim. Behav* **55**, 97–107.  
593 (doi:10.1006/anbe.1997.0588)
- 594 37. Greenberg, B. 1969 Salmonella suppression by known populations of bacteria  
595 in flies. *J. Bacteriol.* **99**, 629–635.
- 596 38. Russell, V. & Dunn, P. E. 1996 Antibacterial Proteins in the Midgut of  
597 *Manduca sexta* During Metamorphosis. *I. Insect Physiol* **42**, 65–71.  
598 (doi:10.1016/0022-1910(95)00083-6)
- 599 39. Duarte, A., Welch, M., Wagner, J. & Kilner, R. M. 2016 Privatization of a  
600 breeding resource by the burying beetle *Nicrophorus vespilloides* is associated  
601 with shifts in bacterial communities. **44**. (doi:dx.doi.org/10.1101/065326)
- 602 40. TRUMBO, S. T. 2016 Fate of mouse carcasses in a Northern Woodland. *Ecol.*  
603 *Entomol.* , 737–740. (doi:10.1111/een.12341)
- 604 41. Spanu T, Posteraro B, Fiori B, D’Inzeo T, Campoli S, Ruggeri A, Tumbarello  
605 M, Canu G, Treccarichi EM, Parisi G, Tronci M, Sanguinetti M, Fadda G. 2012  
606 Direct MALDI-TOF mass spectrometry assay of blood culture broths for rapid  
607 identification of *Candida* species causing bloodstream infections: An  
608 observational study in two large microbiology laboratories. *J. Clin. Microbiol.*  
609 **50**, 176–179. (doi:10.1128/JCM.05742-11)
- 610 42. Rahi, P., Prakash, O. & Shouche, Y. S. 2016 Matrix-Assisted Laser  
611 Desorption/Ionization Time-of-Flight Mass-Spectrometry (MALDI-TOF MS)  
612 Based Microbial Identifications: Challenges and Scopes for Microbial  
613 Ecologists. *Front. Microbiol.* **7**, 1359. (doi:10.3389/fmicb.2016.01359)
- 614 43. Santos IC, Hildenbrand ZL, Schug KA, Krásný L, Hynek R, Hochel I,

- 615 Havlicek V, Lemr K, Schug KA, Fenselau C, Demirev PA, Lay JO, Dingle TC,  
616 Butler-Wu SM, Lay JO, Freiwald A, Sauer S, Carbonnelle E, Mesquita C, Bille  
617 E, Day N, Dauphin B, Beretti J-L, Ferroni A, Gutmann L, Nassif X, Fournier  
618 P-E, Drancourt M, Colson P, Rolain J-M, Scola B La, Raoult D, Murray PR,  
619 Croxatto A, Prod'hom G, Greub G, Belkum A van, Welker M, Erhard M,  
620 Chatellier S, Bedair M, Sumner LW, Lovecka P, Pacovska I, Stursa P,  
621 Vrchotova B, Kochankova L, Demnerova K, Emami K, Askari V, Ullrich M,  
622 Mohinudeen K, Anil AC, Khandeparker L, Burgess JG, Mesbahi E, Kopcakova  
623 A, Stramova Z, Kvasnova S, Godany A, Perhacova Z, Pristas P, Koubek J,  
624 Uhlik O, Jecna K, Junkova P, Vrkoslavova J, Lipov J, Kurzawova V, Macek T,  
625 Mackova M, Ferreira L, Sanchez-Juanes F, Garcia-Fraile P, Rivas R, Mateos  
626 PF, Martinez-Molina E, Gonzalez-Buitrago JM, Velazquez E, Štursa P, Uhlík  
627 O, Kurzawová V, Koubek J, Ionescu M, Strohalm M, Lovecká P, MacEk T,  
628 MacKová M, Ruelle V, Moulaj B El, Zorzi W, Ledent P, Pauw E De,  
629 Dieckmann R, Graeber I, Kaesler I, Szewzyk U, Döhren H von, Singhal N,  
630 Kumar M, Kanaujia PK, Virdi JS, Tan KE, Ellis BC, Lee R, Stamper PD,  
631 Zhang SX, Carroll KC, Singh O V., Wang Z, Russon L, Li L, Roser DC, Long  
632 SR, Deutschbauer AM, Chivian D, Arkin AP, Green BD, Keller M, Kelleher  
633 NL, Yates JR, Ruse NA, Cristian I, Chandramouli K, Qian P, Demirev PA,  
634 Fenselau C, Zhang Y, Fonslow BR, Shan B, Baek M, Yates JR, Bogdanov B,  
635 Smith RD, Johnson RS, Davis MT, Taylor JA, Patterson SD, Demirev PA,  
636 Feldman AB, Kowalski P, Lin JS, Warscheid B, Fenselau C, Maron PA,  
637 Ranjard L, Mougél C, Lemanceau P, Kurian D, Jansèn T, Mäenpää P, Kan J,  
638 Hanson TE, Ginter JM, Wang K, Chen F, Vriendt K De, Theunissen S,  
639 Carpentier W, Smet L De, Devreese B, Beeumen J Van, Heim S, Ferrer M,  
640 Heuer H, Regenhardt D, Nimitz M, Timmis KN, Lacerda CMR, Choe LH,  
641 Reardon KF, Sandrin TR, Goldstein JE, Schumaker S, Olive DM, Bean P,  
642 Emerson D, Agulto L, Liu H, Liu L, Giebel RA, Fredenberg W, Sandrin TR,  
643 Siegrist TJ, Anderson PD, Huen WH, Kleinheinz GT, McDermott CM, Sandrin  
644 TR, Angolini CFF, Pilau EJ, Lopes-Oliveira PF, Garcia INS, Gozzo FC,  
645 Oliveira VM de, Marsaioli AJ, Munoz R, López-López A, Urdiain M, Moore  
646 ERB, Rosselló-Móra R, Donohue MJ, Best JM, Smallwood AW, Kostich M,  
647 Rodgers M, Shoemaker JA, Eddabra R, Prévost G, Scheftel J-M, Stets MI,  
648 Pinto AS, Huergo LF, Souza EM de, Guimarães VF, Alves AC, Steffens MBR,  
649 Monteiro RA, Pedrosa FDO, Cruz LM, Ghyselinck J, Hoorde K Van, Hoste B,  
650 Heylen K, Vos P De, Vidali M, Uhlik O, Strejcek M, Junkova P, Sanda M,  
651 Hroudova M, Vlcek C, Mackova M, Macek T, Tomás-Gallardo L, Canosa I,  
652 Santero E, Camafeita E, Calvo E, López JA, Floriano B, Kim YH, Cho K, Yun  
653 SH, Kim JY, Kwon KH, Yoo JS, Kim S Il, Pessione E, Giuffrida MG, Prunotto  
654 L, Barello C, Mazzoli R, Fortunato D, Conti A, Giunta C, Wilmes P, Wexler  
655 M, Bond PL, Dettmer K, Aronov PA, Hammock BD, Mapelli V, Olsson L,  
656 Nielsen J, Edwards JL, Kennedy RT, Persson S, Sönksen CP, Frigaard NU,  
657 Cox RP, Roepstorff P, Miller M, Valentine N, Wunschel S, Wunschel D,  
658 Petersen C, Wahl K, Toh-boyo GM, Basile F. 2016 Applications of MALDI-  
659 TOF MS in environmental microbiology. *Analyst* **141**, 2827–2837.  
660 (doi:10.1039/C6AN00131A)
- 661 44. Ferreira, L., Sánchez-Juanes, F., García-Fraile, P., Rivas, R., Mateos, P. F.,  
662 Martínez-Molina, E., González-Buitrago, J. M. & Velázquez, E. 2011 MALDI-  
663 TOF mass spectrometry is a fast and reliable platform for identification and  
664 ecological studies of species from family rhizobiaceae. *PLoS One* **6**.

- 665 (doi:10.1371/journal.pone.0020223)
- 666 45. He, Y., Li, H., Lu, X., Stratton, C. W. & Tang, Y. W. 2010 Mass spectrometry  
667 biotyper system identifies enteric bacterial pathogens directly from colonies  
668 grown on selective stool culture media. *J. Clin. Microbiol.* **48**, 3888–3892.  
669 (doi:10.1128/JCM.01290-10)
- 670 46. Angelakis E, Yasir M, Azhar EI, Papadioti A, Bibi F, Aburizaiza AS, Metidji  
671 S, Memish ZA, Ashshi AM, Hassan AM, Harakeh S, Gautret P, Raoult D.  
672 2014 MALDI-TOF mass spectrometry and identification of new bacteria  
673 species in air samples from Makkah, Saudi Arabia. *BMC Res. Notes* **7**, 892.  
674 (doi:10.1186/1756-0500-7-892)
- 675 47. Hongoh, Y., Yuzawa, H., Ohkuma, M. & Kudo, T. 2003 Evaluation of primers  
676 and PCR conditions for the analysis of 16S rRNA genes from a natural  
677 environment. *FEMS Microbiol. Lett.* **221**, 299–304. (doi:10.1016/S0378-  
678 1097(03)00218-0)
- 679 48. Oksanen J, Blanchet FG, Kindt R, Legendre P, Minchin PR, O'Hara RB. 2015  
680 Vegan: community ecology packageR package version 2.3-0. Available at:  
681 <https://github.com/vegandevs/vegan>.
- 682 49. Anderson, M. J. 2006 Distance-based tests for homogeneity of multivariate  
683 dispersions. *Biometrics* **62**, 245–253. (doi:10.1111/j.1541-0420.2005.00440.x)
- 684 50. Martinson, V. G., Moy, J. & Moran, N. A. 2012 Establishment of characteristic  
685 gut bacteria during development of the honeybee worker. *Appl. Environ.*  
686 *Microbiol.* **78**, 2830–2840. (doi:10.1128/AEM.07810-11)
- 687 51. Ramette, A. 2007 Multivariate analyses in microbial ecology. *FEMS*  
688 *Microbiol. Ecol.* **62**, 142–160. (doi:10.1111/j.1574-6941.2007.00375.x)
- 689 52. Milne, L. J. & Milne, M. 1976 The Social Behavior of Burying Beetles. *Sci.*  
690 *Am.* **235**, 84–89. (doi:10.1038/scientificamerican0876-84)
- 691 53. Kaltenpoth, M. & Steiger, S. 2014 Unearthing carrion beetles' microbiome:  
692 Characterization of bacterial and fungal hindgut communities across the  
693 Silphidae. *Mol. Ecol.* **23**, 1251–1267. (doi:10.1111/mec.12469)
- 694 54. Blum, J. E., Fischer, C. N., Miles, J. & Handelsman, J. 2013 Frequent  
695 replenishment sustains the beneficial microbiome of *Drosophila melanogaster*.  
696 *MBio* **4**, 1–8. (doi:10.1128/mBio.00860-13)
- 697 55. Arce, A. N., Smiseth, P. T. & Rozen, D. E. 2013 Antimicrobial secretions and  
698 social immunity in larval burying beetles, *Nicrophorus vespilloides*. *Anim.*  
699 *Behav.* **86**, 741–745. (doi:10.1016/j.anbehav.2013.07.008)
- 700 56. Trumbo, S. T., Sikes, D. S. & Philbrick, P. K. B. 2016 Parental care and  
701 competition with microbes in carrion beetles: a study of ecological adaptation.  
702 *Anim. Behav.* **118**, 47–54. (doi:10.1016/j.anbehav.2016.06.001)
- 703 57. Kim, J. K., Han, S. H., Kim, C. H., Jo, Y. H., Futahashi, R., Kikuchi, Y.,  
704 Fukatsu, T. & Lee, B. L. 2014 Molting-associated suppression of symbiont  
705 population and up-regulation of antimicrobial activity in the midgut symbiotic  
706 organ of the Riptortus-Burkholderia symbiosis. *Dev. Comp. Immunol.* **43**, 10–  
707 14. (doi:10.1016/j.dci.2013.10.010)
- 708 58. Bakula, M. 1969 The persistence of a microbial flora during  
709 postembryogenesis of *Drosophila melanogaster*. *J. Invertebr. Pathol.* **14**, 365–  
710 374. (doi:10.1016/0022-2011(69)90163-3)
- 711 59. GREENBERG, B. 1959 Persistence of bacteria in the developmental stages of  
712 the housefly. IV. Infectivity of the newly emerged adult. *Am. J. Trop. Med.*  
713 *Hyg.* **8**, 618–22.
- 714 60. Broderick, N. A. & Lemaitre, B. 2012 Gut-associated microbes of *Drosophila*

- 715 melanogaster. *Gut Microbes* **3**, 307–321. (doi:10.4161/gmic.19896)
- 716 61. Tryselius, Y., Samakovlis, C., Kimbrell, D. a & Hultmark, D. 1992 CecC, a  
717 cecropin gene expressed during metamorphosis in *Drosophila* pupae. *Eur. J.*  
718 *Biochem.* **204**, 395–399. (doi:10.1111/j.1432-1033.1992.tb16648.x)
- 719 62. Johnston, P. R. & Rolff, J. 2015 Host and Symbiont Jointly Control Gut  
720 Microbiota during Complete Metamorphosis. *PLoS Pathog.* **11**, 1–11.  
721 (doi:10.1371/journal.ppat.1005246)
- 722 63. Urbański, A., Czarniewska, E., Baraniak, E. & Rosiński, G. 2014  
723 Developmental changes in cellular and humoral responses of the burying beetle  
724 *Nicrophorus vespilloides* (Coleoptera, Silphidae). *J. Insect Physiol.* **60**, 98–  
725 103. (doi:10.1016/j.jinsphys.2013.11.009)
- 726 64. Ellegaard, K. & Engel, P. 2016 Beyond 16S rRNA community profiling: intra-  
727 species diversity in the gut microbiota. *Front. Microbiol.* **7**, 1475.  
728 (doi:10.3389/FMICB.2016.01475)
- 729  
730  
731  
732  
733  
734  
735  
736  
737  
738  
739  
740  
741  
742



743

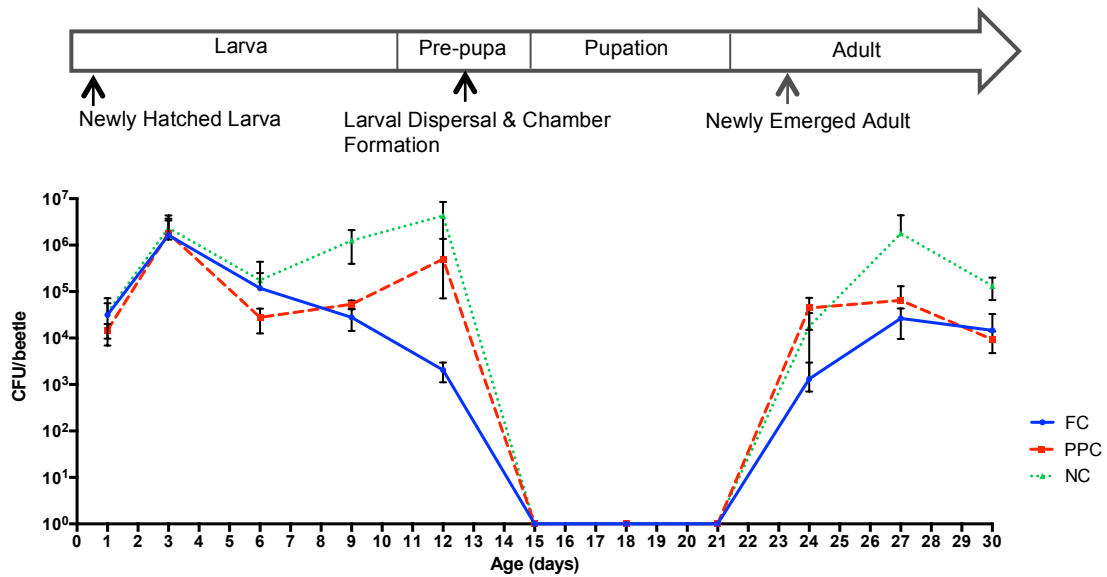

744

745

746 **Figure 1 CFU of *Nicrophorus vespilloides* gut bacteria through development.**

747 Overview of the entire time course of beetle developmental and change in CFU of

748 host gut contents through time (means  $\pm$  SD). FC corresponds to larval guts sample

749 from full parental care broods; PPC, to guts sample from pre-parental care broods;

750 and NC from larval guts sample from no-care broods.

751

752

753

754

755

756

757

758

759

760

761

762

763

764

765

766

767

768

769

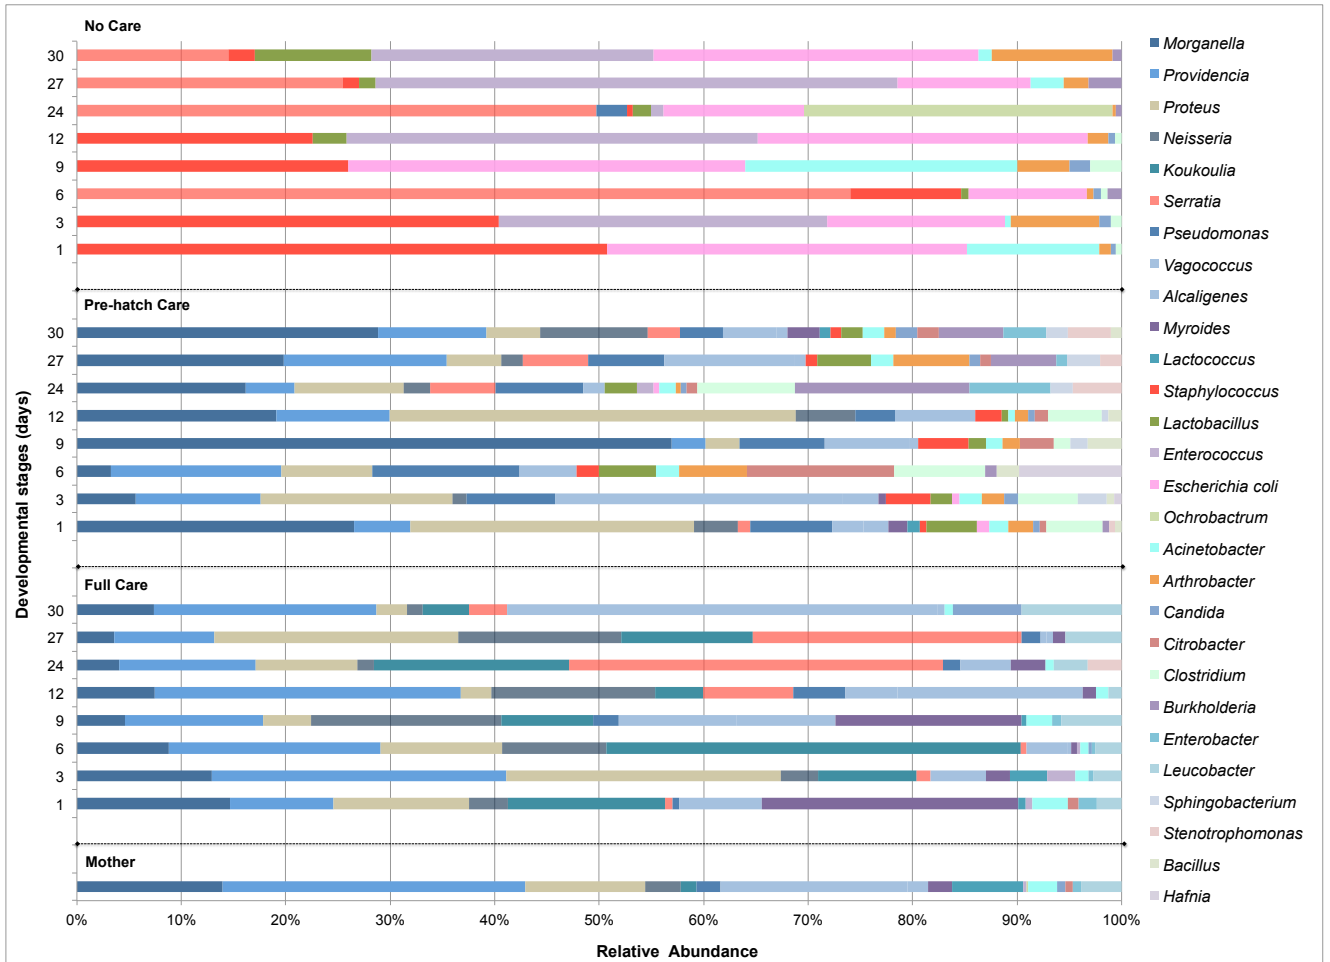

770

771

772 **Figure 2 Composition of *N. vespilloides* gut microbiota through development.**

773 The maternal gut microbiota is shown at bottom, while treatment designations are the  
 774 same as in Figure 1. No CFUs were detectable between days 15-21 of larval  
 775 development, corresponding to the duration of pupation. Three individual larvae were  
 776 independently analyzed for each time point. Y-axis of day 1 to day 9 refers to larval  
 777 stage; day 12 corresponds to prepupal stages; day 24 to day 30 refers to adult  
 778 formation, respectively.

779

780  
781  
782  
783  
784  
785  
786  
787  
788  
789  
790  
791  
792  
793  
794  
795  
796  
797  
798  
799  
800  
801  
802  
803  
804  
805  
806  
807  
808  
809  
810  
811  
812  
813  
814  
815  
816  
817  
818  
819  
820  
821  
822  
823  
824  
825  
826  
827  
828  
829

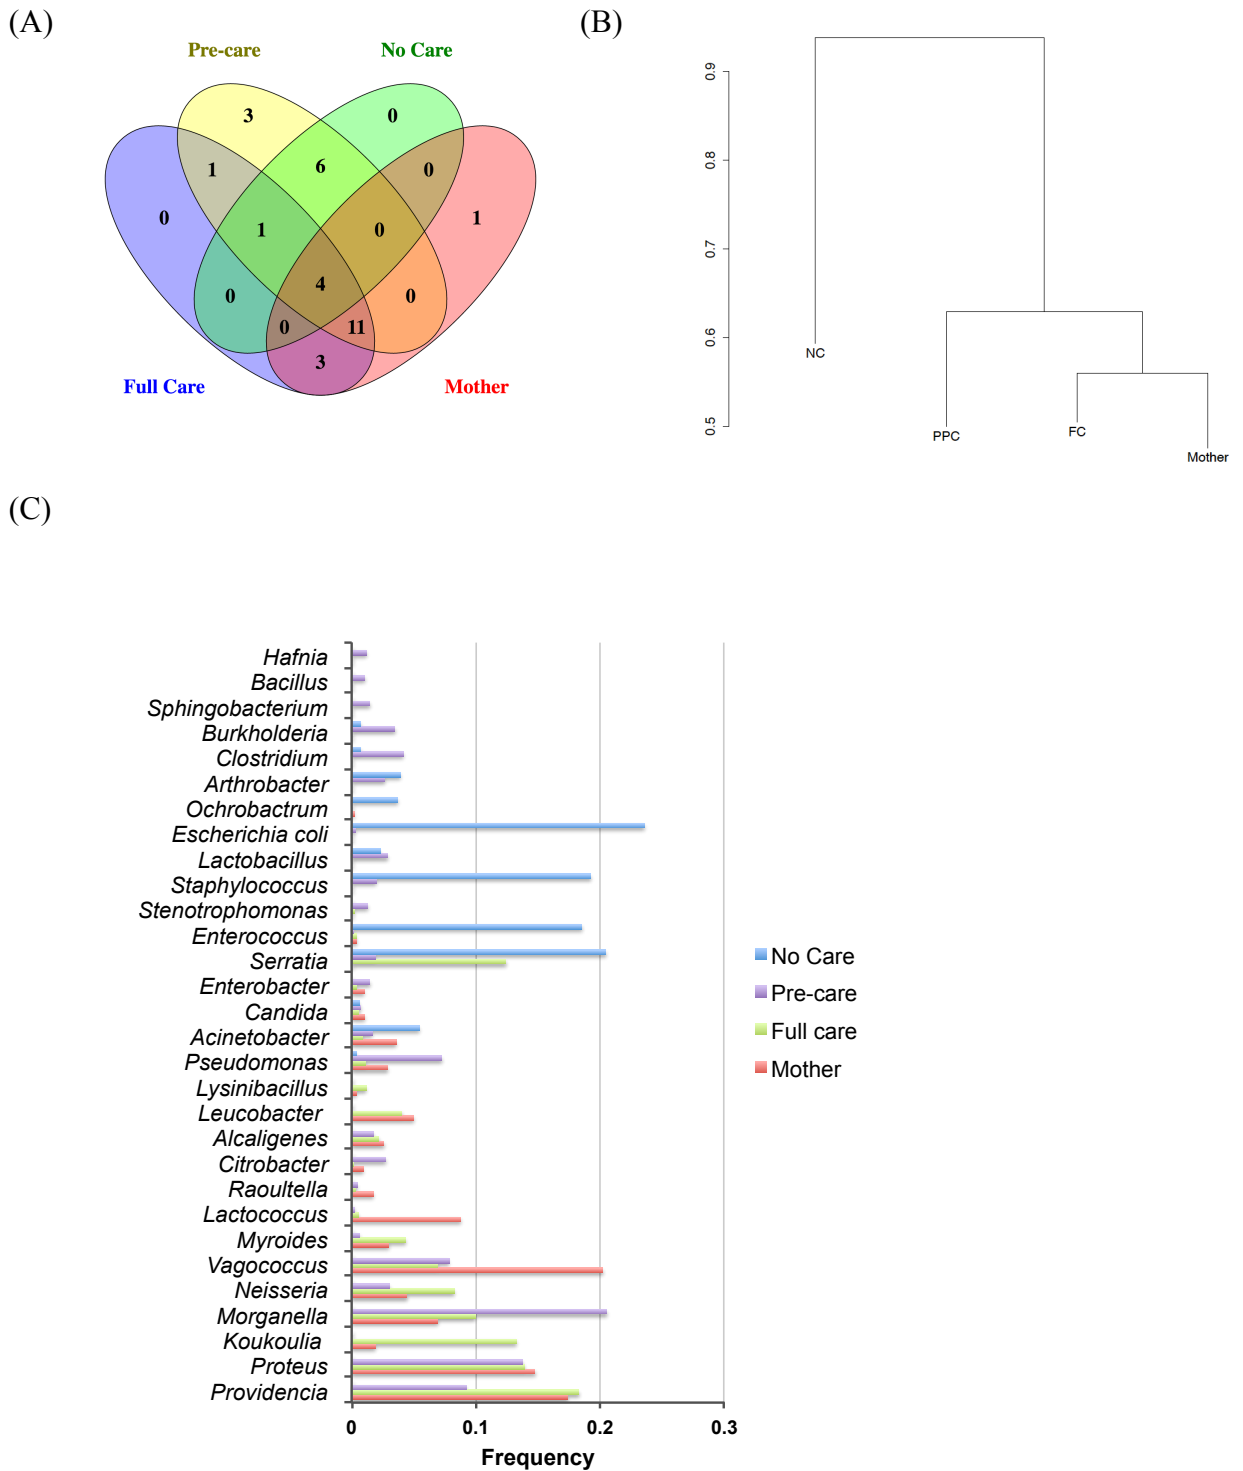

**Figure 3: Frequencies of bacteria from gut communities across parental care treatments.** A) Shared and unique genera between treatment groups. Strains with a minimum frequency of 1% were included. B) Hierarchical clustering on mean similarity of gut microbiota between treatment groups. C) Overall composition of gut communities across treatments. Strains with frequencies lower than 1% across all communities were excluded from plots.



830 (A)  
 831  
 832  
 833  
 834  
 835  
 836  
 837  
 838 (B)  
 839  
 840

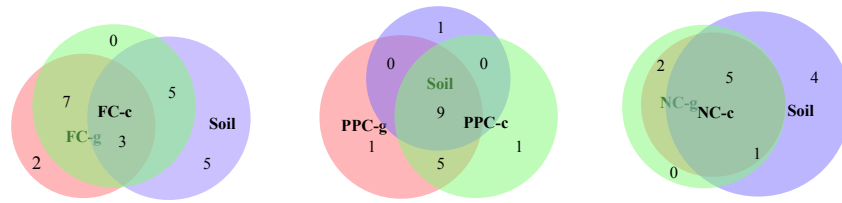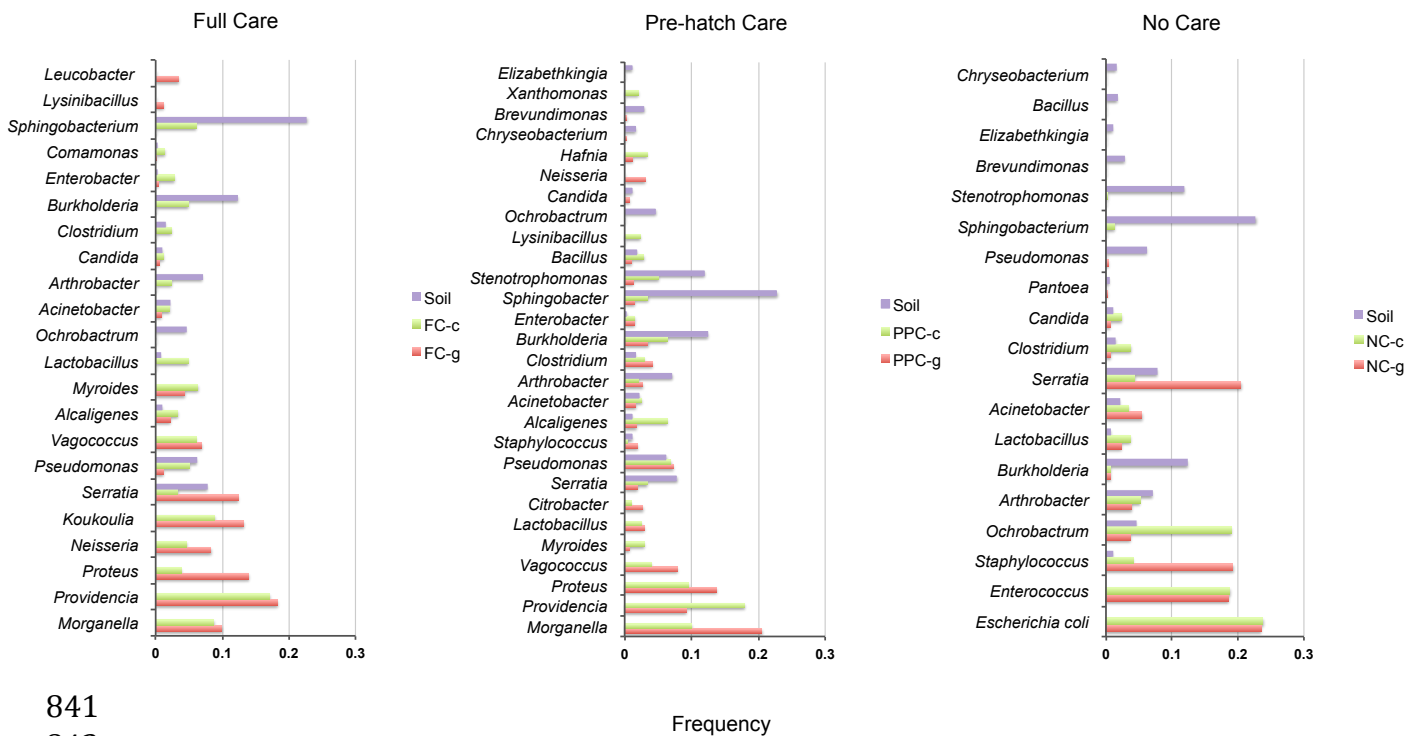

841  
 842  
 843  
 844  
 845  
 846  
 847  
 848  
 849  
 850  
 851  
 852  
 853  
 854  
 855  
 856  
 857  
 858

**Figure 4: Re-colonization of bacterial communities through pupations. A)** Shared and unique genera among treatment groups. Subscripts correspond to the site of isolation; e.g. FC-g corresponds to gut samples, FC-c corresponds to the pupal carapace in the wall of the pupal chamber, and Soil corresponds to bulk soil outside the pupal chamber. **B)** Comparison of gut bacterial communities from each sample site and treatment. Strains with frequencies lower than 1% across all communities were excluded from plots.

859  
 860  
 861  
 862  
 863  
 864  
 865  
 866  
 867  
 868  
 869  
 870  
 871  
 872  
 873  
 874

**Table 1 ANOSIM analysis on bacterial community dissimilarity.** Subscripts correspond to the site of isolation; e.g. FC-g corresponds to gut samples, FC-c corresponds to the pupal carapace and the wall of the pupal chamber, and Soil corresponds to bulk soil outside the pupal chamber.

| Groups                    | R statistic | Significance (P value) | Number of permutations | Number of observed | Test model |
|---------------------------|-------------|------------------------|------------------------|--------------------|------------|
| FC-g, PPC-g, NC-g         | 0.8152      | 0.001                  | 999                    | 352                | Global     |
| FC-g, PPC-g, NC-g, Mother | 0.741       | 0.001                  | 999                    | 264                | Global     |
| FC-c, PPC-c, NC-c, Soil   | 0.7493      | 0.001                  | 999                    | 814                | Global     |
| FC-g, NC-g                | 0.9556      | 0.001                  | 999                    | 144                | Pairwise   |
| PPC-g, NC-g               | 0.9939      | 0.001                  | 999                    | 64                 | Pairwise   |
| FC-g, PPC-g               | 0.6651      | 0.001                  | 999                    | 144                | Pairwise   |
| FC-g, Mother              | 0.2769      | 0.028                  | 999                    | 24                 | Pairwise   |
| PPC-g, Mother             | 0.3306      | 0.066                  | 999                    | 24                 | Pairwise   |
| NC-g, Mother              | 1           | 0.007                  | 999                    | 24                 | Pairwise   |
| FC-g, FC-c                | 0.3177      | 0.068                  | 999                    | 54                 | Pairwise   |
| PPC-g, PPC-c              | 0.0242      | 0.052                  | 999                    | 54                 | Pairwise   |
| NC-g, NC-c                | 0.0134      | 0.397                  | 999                    | 54                 | Pairwise   |
| FC-c, Soil                | 0.8889      | 0.094                  | 720                    | 9                  | Pairwise   |
| PPC-c, Soil               | 1           | 0.114                  | 720                    | 9                  | Pairwise   |
| NC-c, Soil                | 1           | 0.099                  | 720                    | 9                  | Pairwise   |

875  
 876  
 877  
 878  
 879  
 880  
 881  
 882  
 883  
 884  
 885  
 886  
 887
